# Supplementary material
Source: HighWire-hosted journal article supplement (https://www.ijssurgery.com/content/16/6/969)
Supplement: inline-supplementary-material-2 [file inline-supplementary-material-2.xlsx]

## Sheet: Sheet1
1st Author	Year	Title	Country	Journal	Study Design	Risk of bias	Level of evidence (GRADE)	Time span	N =	Population	In & Exclusion criteria	Baseline characteristics	Utility Measurement	Primary outcome of study	Secondary outcome of study	Study conclusions	Results	Intervention	mJOA/MCS/Nurick pre-operative	Standard Deviation/Range	mJOA/MCS/Nurick post-operative	Standard Deviation/Range	Comments
Tian et al	2017	Comparison of the clinical and radiographic results between cervical artificial disc replacement and anterior cervical fusion	China	Clinical Spine Surgery	Prospective nonrandomized comparative study (patients choice)			6 years (68 months min)	63	single- and multilevel degeneration	Inclusion: myelopathy, myeloradiculopathy, unresponsive to conservative treatment for 3 months, suitable for anterior approach, <3 level surgey, IC.	Gender (31 M: 14 F), average age 45	JOA	ASD	Clinical (JOA, NDI, Odom) and radiological (ROM)	ACDA > ACDF in preventing ASD	Significant improvement mJOA/NDI for both groups pre-post op. No difference between groups. ROM C2-C7 did not change pre-post/ ACDF significantly decreased.	ACDF (N=35)	13	±4.0	16.5	± 1.0	Bryan ACDA				radiologisch ASD in 48.6% ACDF en 10/7% ACDA		Author (Year)	Intervention	VAS		NDI		Odom[1] (%)				EQD5C	Complications	Reoperations
											Exclusion: severe degeneration, severe decreased ROM, moderate/severe facet joint degeneration, developmental canal stenosis, cervical instability, osteoporosis, crevical malformations, malignancy, active infections, inflammatory spondylarthopathies, prior surgery at index level							ACDA (N=28)	14.3	±4.4	16.5	± 0.9									Pre-Operative	Post-Operative	Pre-Operative	Post-Operative	Excellent	Good	Fair	Poor
Sorar et al	2007	Cervical compression myelopathy: is fusion the main prognostic indicator?	Turkey	J. Neurosurgery, Spine	Prospective cohort			2.7 years (32,5)	20	single- and mutlilevel	Inclusion: clinical and radiological cervical myelopathy	Gender (17 M : 3 F) , mean age 55	mJOA	neurological outcome, adequacy of decompression on MRI	prognostic factors in patients with inadequate decompression, radiological outcomes	good results with ACDF/corpectomy despite inadequate decompression		ACDF (N=18)	12.8	±0.5	15.6	± 0.4	only outcomes reported for total group						Comparative studies
											Exclusion: not mentioned							Corpectomy (N=6)											Tian et al. (2017)	ACDF	NA		30.00 (-)	29.55 (-)	54.3	42.9	2.9	0	NA	NA	NA
Chen et al	2019	Comparative study of artificial disc replacement and anterior cervical discectomy/fusion in the treatment of cervical spondylotic myelopathy	China	Int J Clin Exp Med	Prospective randomized controlled study			3 years	60	single level	Inclusion: single segment spondylotic myelopathy, requiring surgery. Inclusion: cervical spondylotic myelopathy, single level, C3-C7, no significant improvement or deterioration after 3 months conservative, 18-70y.	Gender (38 M: 22 F), age mean 46.8-48.5)	JOA	VAS, JOA, CCI, ROM, Odom's criteria, ASD, ossification, re-operation rates		No significant differences for JOA, VAS< NDI and Odoms		ACDF (N=30)	7.49	± 2.39	14.59	± 1.22								ACDA			28.40 (-)	25.55 (-)	42.9	50	7.1	0
											Exclusion: cardiovascular and other important organ disorders, severe osteoporosis, fractures, cervical spinal canal stenosis, maligncancy, infections, deformities, prior surgery					cervical curvature index and range of motion differ significantly higehr for ACDA, re-operations etc significantly higher for ACDF		ACDA (N=30)	7.38	± 2.41	15.42	± 0.46							Chen et al. (2019)	ACDF	7.33 (±1.61)	1.31 (±0.37)	37.47 (±6.86)	6.89 (±2.53)	97.4		-	-	NA	NA	NA
Cheng et al	2011	Superiority of the Bryan Disc Prothesis for Cervical Myelopathy	China	Clin Orthopedics and related research	Prospective randomized controlled study			3 years	83	single- and mutlilevel	Inclusion: intractable cervical myelopathy due to degeneration, single- or multilevel from C3-C7, failed non-operative treatment for 12 weeks	gender (44 M : 39 F), no differences in age and smoking	JOA	Odom, JOA, SF-36, NDI	Blood loss, return to work	Prothesis significantly better for clinical outcomes	Significantly better outcome for the ACDA group	ACDF (N=42)	9	± 1.2	14.8	±1.2	Bryan ACDA							ACDA	7.54 (±1.44)	1.29 (±0.41)	38.63 (±5.77)	7.11 (±3.73)	96.7		-	-
											Exclusion: patients requiring immediate treatment, infection, severe osteoporosis, severe cervical spine surgery, OPLL, bechterew, facet disease, no motion on X ray			ROM, stability, subsidence				ACDA (N=41)	9	± 1.2	15.2	±1.2							Cheng et al. (2011)	ACDF	NA		50.10 (±5.80)	6.96 (-)	95			-	NA	Dysphagia in 16.5% of ACDF group, pseudarthrosis in 7.2% of ACDF group	NA
Sun et al	2020	Radiological and Clinical Outcomes of a Disc-Limited Intervertebral Distraction Technique Applied in Anterior Cervical Discectomy and Fusion - A Proposed Method to Assist Cage Selection	China	World Neurosurgery	prospective cohort study			1 year	61	single level	Inclusion criteria: indication for ACDF, no emergency surgery, no significant neck and shoulder pain, no significant degeneration of the adjacent intervertebral space.	N(male)=32, N(female)=29	JOA	2		Treatment of CSM with ACDF with application of disc-limited distraction technique may be advantageous		normal ACDF (N=31)	8.9	± 1.4	13.6	± 1.5								ACDA			50.60 (±6.00)	1.74 (-)	100
											Exlusion criteria: history of cervical surgery, advanced degenerative changes, cervical kyphosis, concomitant infectious/neoplastic/metabolic diseases, signs of neck instability on preoperative lateral flexion-extension radiographs							distraction ACDF (N=30)	8.8	± 1.5	13.3	± 1.5							Sun et al. (2020)	Normal ACDF	1.39 (-)	1.51 (-)	NA		NA				NA	NA	NA
Zika et al	2020	Outcome factors in surgically treated patients for cervical spondylotic myelopathy	Greece	The Journal of Spinal Cord Medicine	Prospective study			5 years	36	single- and multilevel degeneration	Inclusion criteria: presence of symptoms or signs suggestive of CSM, and compatible findings in imaging work-up	N(male)=21, N(female)=15, mean age=50.8 years, mean BMI=27.3	mJOA	mJOA, NPE		Sustained improvement of CSM with ACDF at 5 year follow-up		ACDF	10.8	± 1.9	15.5	± 3								Distraction ACDF	1.51 (-)	1.17 (-)
											Exclusion criteria: infection, neoplastic disease, previous surgery for CSM, rheumatoid arthritis, ankylosing spondylitis, previous trauma, and symptomatic lumbar spinal stenosis																		Cohort studies
Pescatori et al	2020	Cervical Spondylotic Myelopathy: When and Why the Cervical Corpectomy?	Italy	World Neurosurgery	Prospective study			3 years	60	single- and multilevel degeneration	Inclusion criteria: clinical signs and symptoms of CSM, neurophysiological confirmation of deficits, MRI and CT criteria for cervical mono- and multisegmental cord compression and/or myelopathy due to spondylosis	N(male)=35, N(female)=25, mean age = 57.48 +- 10.60	mJOA	mJOA	Identification of independent prognostic factors influencing the clinical outcomes; radiological outcomes	Single- and multilevel corpectomy = valid and safe option in treatment of CSM. Statistically significant improvement in mJOA scores and neurophysiological parameters.		Corpectomy (mild/moderate CSM)	13.23	-	16	-							Li et al. (2019)	Anterior (ACD + ACDF + corpectomy)	NA		NA		NA				NA	NA	NA
											Exclusion criteria: previous surgery on cervical spine, contraindications to surgery, systematic degenerative disease, depression, and follow-up data available for <6 months							Corpectomy (severe CSM)	7.26	-	12.66	-							Pandita et al. (2018)	ACDF	NA		NA		NA				NA	NA	NA
Li et al	2019	Recovery Process After Anterior Cervical Compression in Patients With Cervical Spondylotic Myelopathy With Different Natural History	China	Clinical Spine Surgery	Prospective cohort study			1 year	117	single- and multilevel degeneration	Inclusion criteria: CSM with obvious cervical myelopathy symptoms, informed consent, spinal cord compression in radiologic image.	N(male)=69, N(female)=48	JOA	JOA, PBSE	Investigation of the influence of natural history features on the postoperative recovery process	Maximum recovery within 1 year, but recovery declined slightly in late follow-up		Anterior (ACD + ACDF + Corpectomy)	11.47	± 1.27	14.67	± 1.27	JOA niet per chirurgische groep te onderscheiden						Zika et al. (2020)	ACDF	NA		NA		NA				NA	NA	NA
											Exclusion criteria: cervical surgery, tumors, trauma, surgical spinal infection, systemic rheumatologic disease, symptomatic cerebrovascular such as cerebral infarction, conmitant lumbar or thoracic stenosis, or long segmental ossified posterior longitudinal ligament identified by radiological evaluation																		Pescatori et al. (2020)	Corpectomy (mild/moderate CSM)	NA		NA		NA				NA	NA	NA
Zhang	2020	Multi-shot echo-planar diffusion tensor imaging in cervical spondylotic myelopathy	China	Spine	Prospective longitudinal cohort			5 years	35	n/a	Inclusion: CSM	Gender (12 M: 23 F), average age 54.9, mean duration of symtoms 28 months	mJOA	association between diffusion tensor imaging and clinical outcomes	mJOA, NDI, VAS	imaging showed a significant association with neurological recovery, optimal recovery after 2 years		ACDF (N=35)	11.98	±2.21	16.54	± 1.07								Corpectomy (severe CSM)
											Exclusion criteria: previous spinal surgery; a history of cervical trauma; a history of stroke and other neurological disease; cervical radiculop- athy but no clinical evidence of cervical myelopathy, without radiological evidence of cervical canal stenosis, and those with a contraindication to MRI																		Zhang et al. (2020)	ACDF	5.67 (±1.63)	1.01 (±2.11)	9.67 (±2.66)	2.78 (±1.49)	NA				NA	NA	NA
Pehlivanoglu et al	2019	Clinical and Radiographic Outcome of Patients With Cervical Spondylotic Myelopathy Undergoing Total Disc Replacement	Germany	Spine	Nonrandomized, prospective study			2 years	18	single- and mulitlevel degeneration	Inclusion criteria: symptomatic cervical degenerative disc disease (DDD), clinical symptoms of myelopathy including upper motor neuron/long tract signs (hyperreflexia, positive Hofmann test), soft disc hernition, cervical spinal stenosis/hard disc, adjacent segment degeneration in fusion cases, degeneration in at least one segment, level C3-C7, failed conservative treatment for at least 12 weeks,…	N(male)=10, N9(female)=8	JOA	NDI, VAS, JOA, ROM	radiologic outcomes	CTDR in CSM yields good clinical (and radiographic) outcomes and = reliable, safe, and motion-preserving		ACDA (N=18)	11.3	± 0.3	16.6	± 0.1							Pehlivanoglu et al. (2019)	ACDA	Arm 5.70 (±0.50)	Arm 1.30 (±0.30)	36.70 (±1.40)	10.30 (±1.20)	NA				NA	NA	NA
																															Neck 6.10 (±0.70)	Neck 2.00 (±0.30)
Pandita	2018	Neurological Recovery Pattern in Cervical Spondylotic Myelopathy after Anterior Surgery: A Prospective Study with Literature Review	India	Asian Spine Journal	Prospective cohort			1 year	30	Single- and multilevel	Inclusion: adult patients of either sex, aged 40–75 years, with CSM due to one or two motion segment involvement were enrolled	Gender (18 M: 12 F), average age 51.07±9.39 years	mJOA + Nurick	Neurological recovery after ACDF + stabilisation	comparison with literature	Neurological recovery after surgical decompression starts from the 3rd postoperative month and progresses until the 6th postoperative month;		ACDF (N=30)	12.4	±3.68	14.92	±3.24							Tian et al. (2010)	ACDA	NA		-	11.20 (-)	54	44	2	0	NA	Anterior migration of prosthesis of 2mm in one patient at 6-month follow-up	NA
											Exclusion: associated neurological disorders, such as Parkinson’s disease and hemiplegia; myelopathy due to other degenerative conditions of the spine, such as ossified posterior lon- gitudinal ligament, tumors (intradural and extradural), and infective pathologies like tuberculosis were excluded.
Tian et al	2010	Clinical and radiographic results of cervical artificial disc arthroplasty: over three years follow-up cohort study	China	Chinese Medical Journal	Prospective cohort study			mean = 41.85 months	50	single- and multilevel degeneration	Inclusion: patients who underwent surgery with the BRYAN Cervical Disc System from Dec 2003 to Jan 2006	N(male)=35, N(female)=15	JOA	JOA, NDI, ROM	Radiographic outcomes	Clinical (and radiographic) results of cervical disc arthroplasty are good in mid-term follow-up with preservation of normal range of motion of the operated level and preservation of the biomechanics in the cervical spine		ACDA	14	-	16.5	-							[1]4=poor, 3=fair, 2=good, 1=excellent
