# Supplementary material
Source: HighWire-hosted journal article supplement (https://www.ijssurgery.com/content/16/6/969)
Supplement: inline-supplementary-material-3 [file inline-supplementary-material-3.docx]

| **Author** | **Design** | **Randomization process** | **Bias due to deviation from intended intervention** | **Bias due to missing data** | **Bias in measure outcome** | **Bias in selection of the reported results** | **Other bias** | **Conclusion** |
| --- | --- | --- | --- | --- | --- | --- | --- | --- |
| Chen et al (2019) | Prospective randomized comparative study | ● | ● | ● | ● | ● | None | ● |
| Cheng et al (2011) | Prospective randomized comparative study | ● | ● | ● | ● | ● | None | ● |

**ROBINS-I**

| **Author** | **Study design** | **Bias due to confounding** | **Bias in selecting patents** | **Bias in classification of interventions** | **Bias due to deviation from intended intervention** | **Bias due to missing data** | **Bias in measure outcome** | **Bias in selection of the reported results** | **Other bias** | **Conclusion** |
| --- | --- | --- | --- | --- | --- | --- | --- | --- | --- | --- |
| Sorar et al (2007) | Prospective nonrandomized comparative study | ● | ● | ● | n.a. | ● | ● | ● | None | ● |
| Sun et al (2020) | Prospective nonrandomized comparative study | ● | ● | ● | ● | ● | ● | ● | None | ● |
| Zika et al (2020) | Prospective cohort study | ● | ● | ● | n.a. | ● | ● | ● | None | ● |
| Pescatori et al (2020) | Prospective cohort study | ● | ● | ● | n.a. | ● | ● | ● | None | ● |
| Li et al (2019) | Prospective cohort study | ● | ● | ● | n.a. | ● | ● | ● | None | ● |
| Zhang et al (2020) | Prospective cohort study | ● | ● | ● | n.a. | ● | ● | ● | None | ● |
| Pehlivanoglu et al (2019) | Prospective nonrandomized study | ● | ● | ● | n.a. | ● | ● | ● | None | ● |
| Pandita et al (2018) | Prospective cohort study | ● | ● | ● | n.a. | ● | ● | ● | None | ● |
| Tian et al (2010) | Prospective cohort study | ● | ● | ● | n.a. | ● | ● | ● | None | ● |
